# Supplementary material for: Test strips for detection of 4-nitrophenol based on fluorescence quenching and color change of black phosphorus quantum dots
Source: Royal Society of Chemistry journal article supplement (doi:10.1039/d5nj02869h), 2025-01-01
Supplement: d5nj02869h1.pdf [file d5nj02869h1.pdf]

## Electronic Supplementary Information

### **Test strips for detection of 4-nitrophenol based on fluorescence quenching and color change of black phosphorus quantum dots**

Lijun Wang<sup>a</sup>, Aiying Hou<sup>a</sup>, Min Wang<sup>a</sup>, Armando A. Paneque Quevedo<sup>b</sup>,

Qiaoli Yue<sup>a, \*</sup>

<sup>a</sup> School of Chemistry and Chemical Engineering, Liaocheng University, Liaocheng  
252059, China

<sup>b</sup> Department of Chemistry, University of Havana, Havana, 17100, Cuba

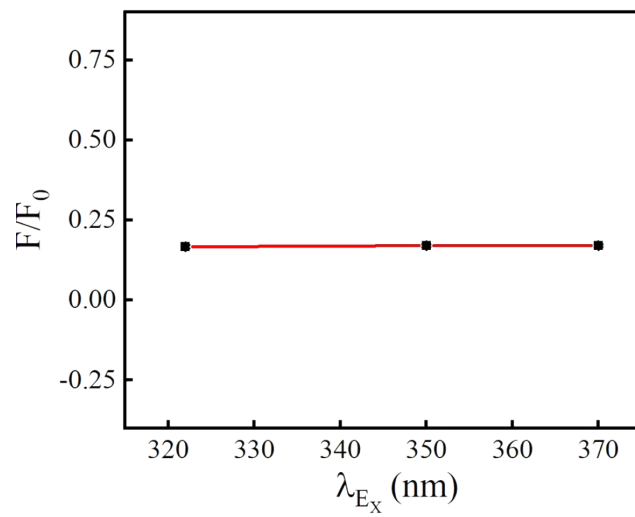

**Fig. S1** The relationship between the fluorescence intensity ratio of BPQDs+4-NP and BPQDs

( $F/F_0$ ) and the excitation wavelength

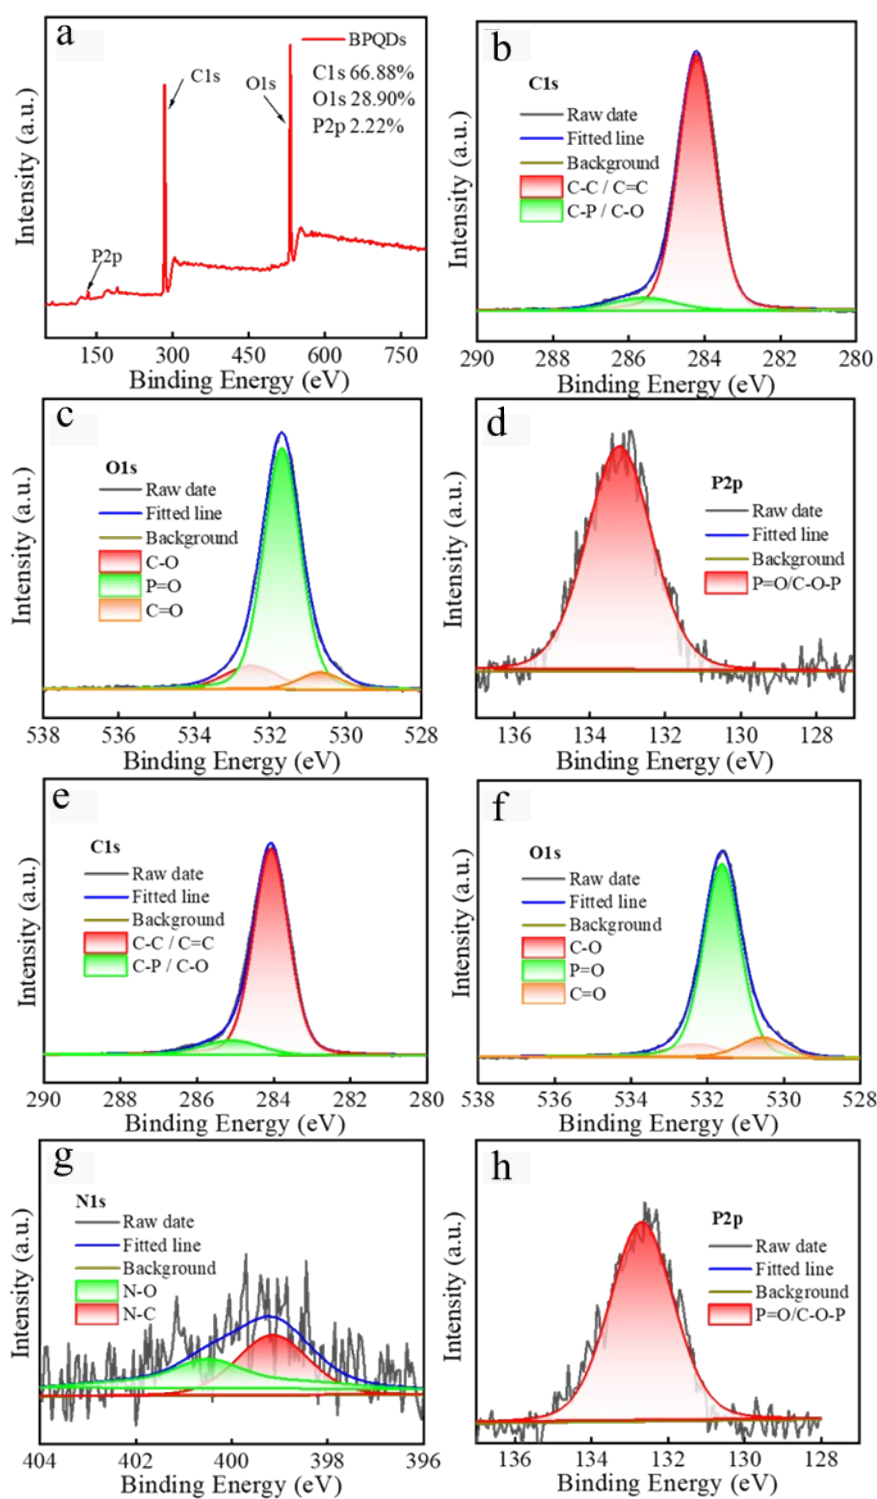

**Fig. S2** a Full-scan XPS spectrum and HR-XPS spectra of **b** C1s, **c** O1s, **d** P2p for BPQDs, and

HR-XPS spectra of **e** C1s, **f** O1s, **g** N1s, **h** P2p for BPQDs+4-NP

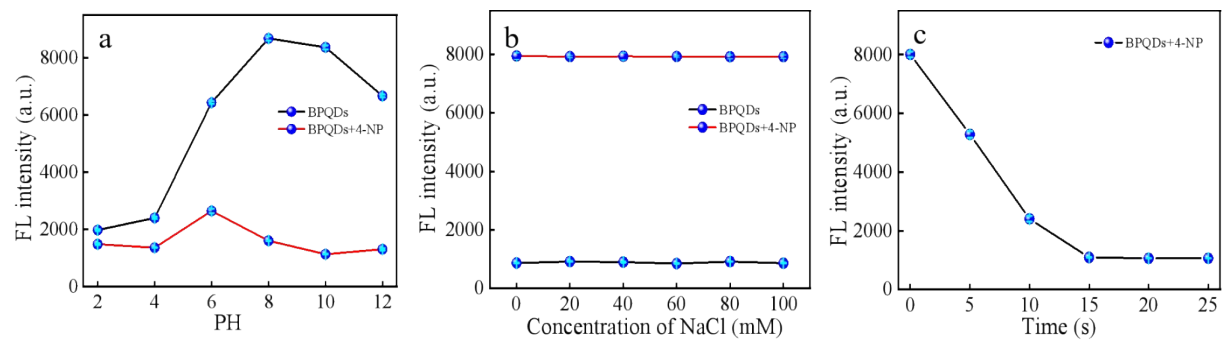

**Fig. S3** Effect of **a** pH, **b** ionic strength on the fluorescence intensity of BPQDs and BPQDs+4-NP, **c** influence of reaction time on the 4-NP detection

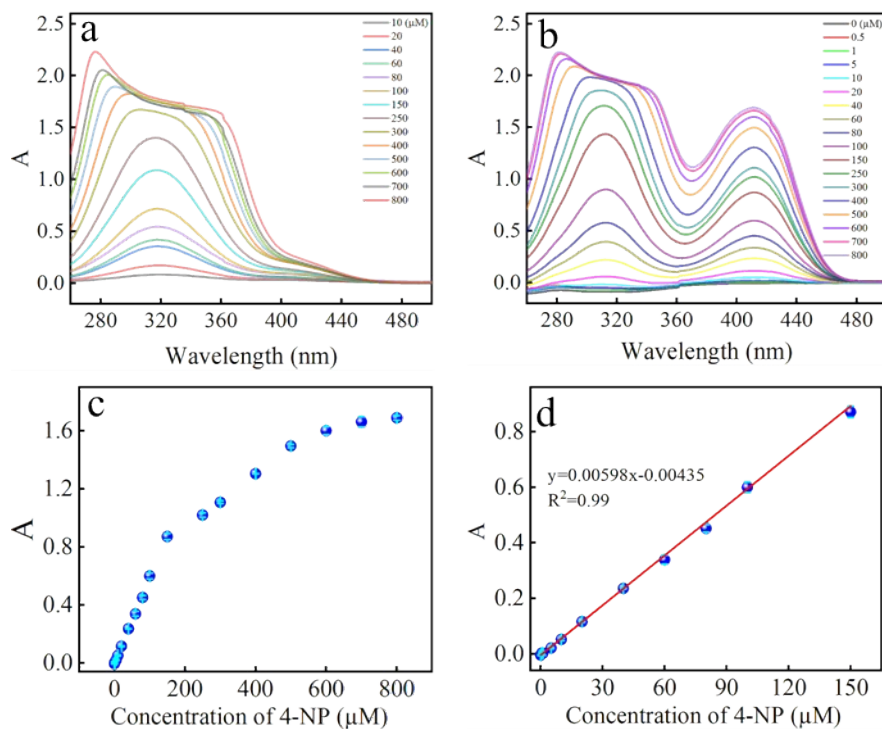

**Fig. S4** **a** Absorption spectra of 4-NP with different concentrations, **b** absorption spectra of BPQDs with different concentrations of 4-NP, **c** the relationship between absorbance at 410 nm and concentration of 4-NP, **d** linear correlation between absorbance and concentration of 4-NP

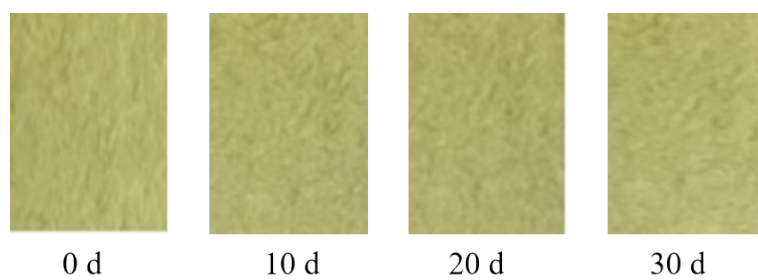

**Fig. S5** Stability evaluation of test strips uploaded by BPQDs+4-NP stored at 4 °C over 30 days

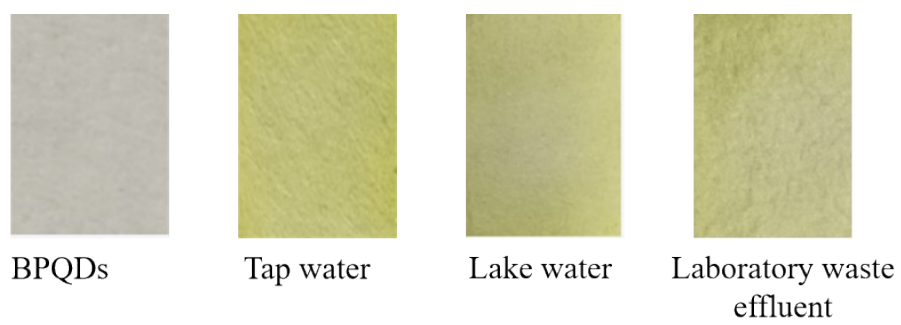

**Fig. S6** Photos of test strips for 4-NP detection in lake, tap and laboratory waste water samples

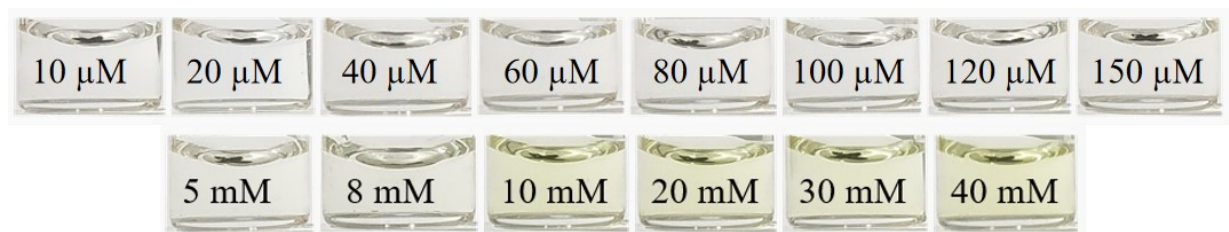

**Fig. S7** Photos under daylight of the dispersion of BPQDs with various concentrations of 4-NP
